# Supplementary material for: Modulating the tunable interfacial charge transfer of Z-scheme TiO2/CdS with Ti–S bonds for enhanced glucose photoreforming
Source: Royal Society of Chemistry journal article supplement (doi:10.1039/d2ta09071f), 2023-01-01
Supplement: d2ta09071f1.pdf [file d2ta09071f1.pdf]

## Supporting materials

1

2 **Modulating tunable interfacial charge transfer via Z-scheme**

3 **TiO<sub>2</sub>/CdS with Ti-S bond for enhanced glucose photoreforming**

4 Malin Eqi,<sup>1,a,b</sup> Cai Shi,<sup>1,a,b</sup> Miao Zhang,<sup>a,b</sup> Fuyan Kang,<sup>a,b</sup> Jianhua Ma,<sup>c</sup> Zhanhua

5 Huang,<sup>a,b\*</sup> Shouxin Liu<sup>a,b</sup>

6

7 <sup>a</sup> Key Laboratory of Bio-based Material Science & Technology, Material Science and

8 Engineering College, Northeast Forestry University, Harbin 150040, China

9 <sup>b</sup> Engineering Research Center of Advanced Wooden Materials, Ministry of

10 Education, Northeast Forestry University, Harbin 150040, China

11 <sup>c</sup> Material Science and Engineering College, Northeast Forestry University, Harbin

12 150000, China

13

14

15

16

17

18

19 1 Malin Eqi and Cai Shi contributed equally to this work

20 \*To whom correspondence can be made

21 E-mail: huangzh1975@163.com (Z. Huang)

22

## 1 ***Materials***

2 All the analytical grade materials were employed directly without further  
3 purification. Cadmium acetate ( $\text{Cd}(\text{CH}_3\text{COO})_2$ ) and thiourea ( $\text{CH}_4\text{N}_2\text{S}$ ) were obtained  
4 from Tianjin Guangfu Fine Chemical Research Institute. Ethylenediamine, tetrabutyl  
5 titanate ( $\text{C}_{16}\text{H}_{36}\text{O}_4\text{Ti}$ ), and hydrofluoric acid (HF) were bought from Shanghai  
6 Macklin biochemical technology Co. LTD. Acetonitrile ( $\text{CH}_3\text{CN}$ ) was bought from  
7 Tianjin Xinbote Chemical Industry Co, Ltd. D-(+)-Glucose ( $\text{C}_6\text{H}_{12}\text{O}_6$ , AR) and  
8 ethylenediamine were purchased from Aladdin Reagent Company, China. Sodium  
9 hydroxide (NaOH) and ethanol were purchased from Tianjin Tianli Chemical Reagent  
10 Co. Deionized water was used throughout the process.

## 11 ***Characterization***

12 The morphology and microstructure were acquired through Quanta200  
13 transmission electron microscopy (TEM) and field emission scanning electron  
14 microscopy (FESEM). The XRD-6100 powder X-ray diffraction (pXRD) was carried  
15 out to obtain the crystalline and phase information. The pore size distribution and  
16 specific surface area were characterized by ASAP2020 Brunauer-Emmett-Teller  
17 (BET) method. IS10 fourier transform infrared spectroscopy (FTIR) were utilized to  
18 acquire chemical structures. The surface elemental compositions and chemical states  
19 were characterized by PHI5700 X-ray photoelectron spectroscopy (XPS) with on-  
20 monochromatic Al X-rays as the primary excitation. TU-1900 UV-vis diffuse  
21 reflectance spectrometer (UV-vis DRS) was carried out to examine light absorption  
22 property. The recombination of  $e^-h^+$  was surveyed by G9800A photoluminescence

1 (PL) spectra. Radicals capture were conducted by JES electron spin resonance (ESR)  
2 with 2, 2, 6, 6-tetramethylpiperidine (TEMP), 5, 5'-dimethyl-1-pyrroline N-oxide  
3 (DMPO).

#### 4 ***Photoelectrochemical test***

5 All the photoelectrochemical and electrochemical measurements were carried out  
6 on CHI660E electrochemical workstation (Shanghai, China) with a three-electrode  
7 system. The three-electrode included working electrode, reference electrode  
8 (Ag/AgCl), and counter electrode (Pt plate). Na<sub>2</sub>SO<sub>4</sub> solution (0.50 mol L<sup>-1</sup>) was  
9 chosen as electrolyte. The working electrode was fabricated by the following detailed  
10 steps: 2 mg sample was dispersed into 1 mL ethanol with ultrasonic for 0.5 h. Then,  
11 10 μL N-methyl-2-pyrrolidone was added to the mixed solution and settled for 5 min.  
12 Applying the mixed solution evenly on the conductive side of the Fluorine-doped tin  
13 oxide (FTO) collector, and then dried under an infrared lamp.

#### 14 ***Photocatalytic activity test***

15 25 mg catalyst was dispersed into 50 mL solution (25 mL deionized water and 25  
16 mL CH<sub>3</sub>CN) involving 1 g L<sup>-1</sup> glucose and 1.5 M NaOH. Prior to exerting light, the  
17 suspension was degassed for 30 min to thoroughly exclude the dispersed oxygen in  
18 suspension to ensure the reactor was under an anaerobic state. The system was  
19 conducted under Hxuv300 Visref 300 W Xenon lamp (Beijing CEJ Tech. Co., Ltd.,  
20 Beijing, China) with magnetically stirring. And the reaction system temperature was  
21 kept at 279 K by circulating condensing system. The produced H<sub>2</sub> was gathered H<sub>2</sub>

1 was intermittently and automatically measured by gas chromatography (GC-7920,  
2 Beijing CEJ Tech. Co., Ltd., Beijing, China) with a thermal conductive detector  
3 (TCD). The liquid product were analyzed by high-performance liquid  
4 chromatography (HPLC, Agilent 1290 Infinity II) with Hi-Plex H (300 × 7.7 mm)  
5 and Agilent Infinity Lab Poroshell 120 HILIC-Z (2.1 mm × 50 mm × 2.7 μm)  
6 columns.

### 7 *DFT calculations*

8 First-principles calculations were carried out on the basis of periodic Density  
9 functional theory (DFT) calculations using a generalized gradient approximation  
10 within the Perdew-Burke-Ernzerhof exchange correction functional. The wave  
11 functions were constructed from the expansion of plane waves with an energy cutoff  
12 of 500 eV. Gamma centered k-piont of 3×3×1 have been used for geometry  
13 optimization. The consistence tolerances for the geometry optimization are set as 1.0  
14 ×10<sup>-5</sup> eV/atom for total energy and 0.05 eV/Å for force, respectively. In order to avoid  
15 the interaction between the two surfaces, a large vacuum gap of 15 Å has been  
16 selected in the periodically repeated slabs. The top 4 atom layers have been set free.  
17 The adsorption energy was calculated according to the standard formula:

$$18 \quad E_{\text{ads}} = E_{\text{Total}} - E_{\text{TiO}_2} - E_{\text{atom}}$$

19

20

21

22

1  
2 **pXRD analysis:** powder X-ray diffraction (pXRD) was carried out to further  
3 investigate the crystalline and phase information of photocatalysts (Fig. 2a). CdS  
4 exhibits distinct diffraction angles at  $2\theta = 26.7^\circ, 30.5^\circ, 43.7^\circ, 48.3^\circ,$  and  $51.5^\circ$ , which  
5 can be indexed to the (211), (101), (102), (110), and (103) lattice planes of CdS  
6 (JCPDS:89-1084), respectively. The pXRD spectrum of TiO<sub>2</sub> with diffraction peaks at  
7  $2\theta = 25.1^\circ, 37.6^\circ, 47.9^\circ, 53.5^\circ, 54.9^\circ, 62.2^\circ, 68.7^\circ, 70.1^\circ$  and  $76.0^\circ$ , corresponding to  
8 the crystallographic planes (101), (001), (200), (105), (211), (213), (116), (220) and  
9 (301) of anatase TiO<sub>2</sub>, respectively (JCPDS card number 21-1272) <sup>[1]</sup>. It is worth  
10 noting that the (001) peaks are broadened and the intensity of the (200) peaks are  
11 enhanced in the TiO<sub>2</sub> XRD patterns compared with the standard one (JCPDS card  
12 number 21-1272). This reveals that the nanosheets grow along the [200] directions  
13 and expose the (001) planes <sup>2</sup>. The exposed (001) crystal planes of TiO<sub>2</sub> have multiple  
14 active centers, which facilitate the e<sup>-</sup>-h<sup>+</sup> separation and ·OH production, resulting in  
15 improved photoreforming efficiency <sup>3</sup>. No peak shift is observed, which excludes the  
16 incorporation of CdS and TiO<sub>2</sub> into each other's lattice.

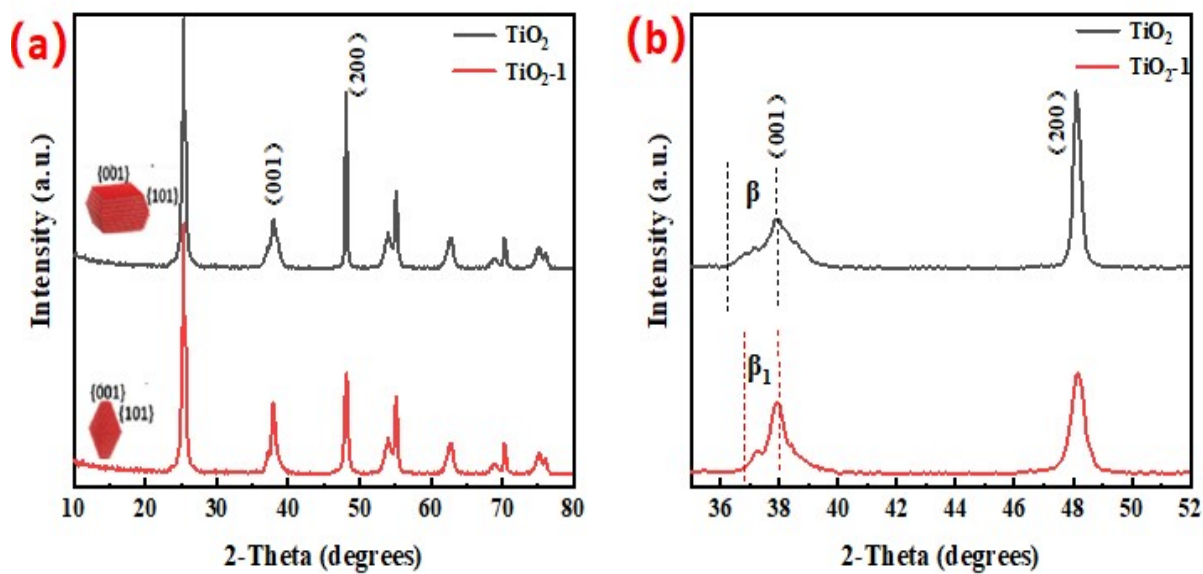

1

2 Fig. S1 (a) The XRD pattern of TiO<sub>2</sub> and TiO<sub>2</sub>-1. (b) The locally enlarged XRD

3

pattern for the (001) and (200) peaks

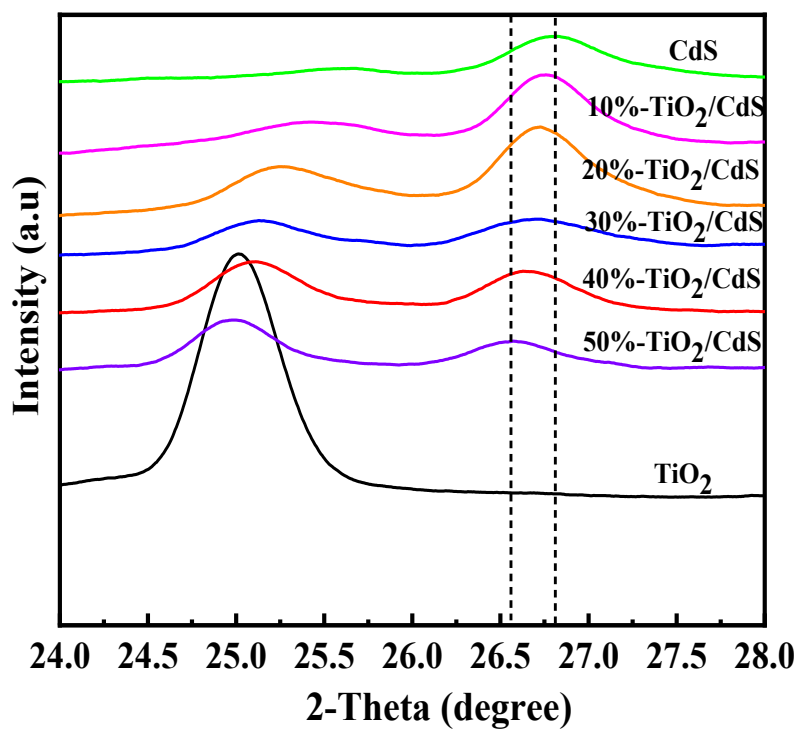

4

5 Fig. S2 The locally enlarged XRD pattern for the catalysts in the range of 24 to 28 °.

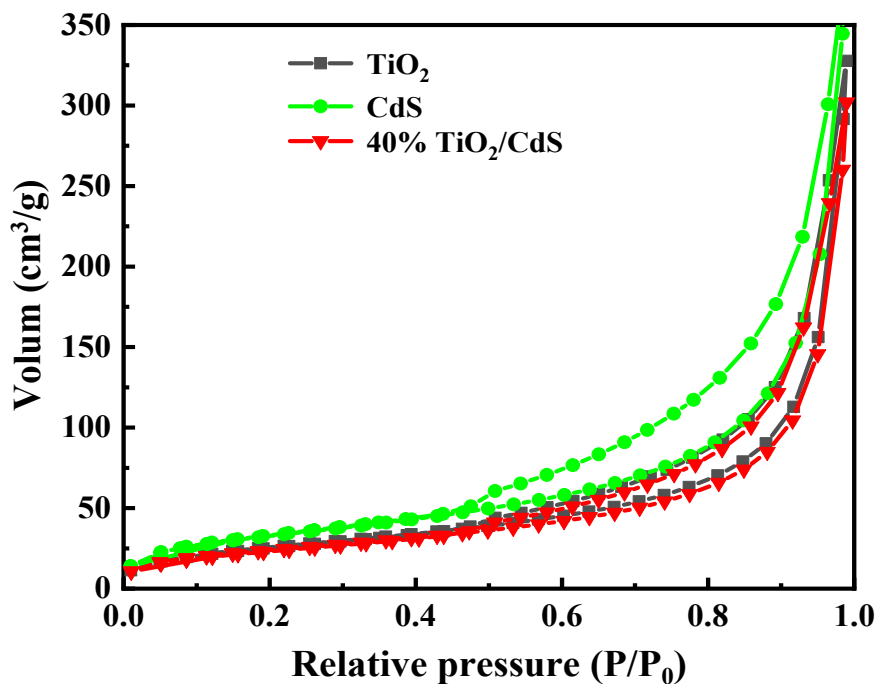

1  
2  
3  
4

Fig. S3 The Nitrogen adsorption isotherms patterns of catalysts

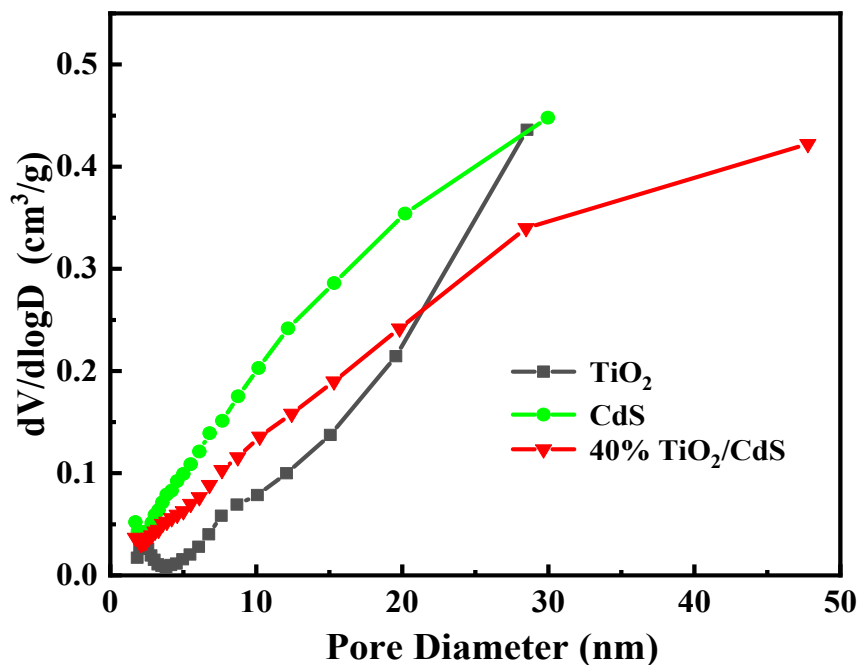

5  
6

Fig. S4 The pore size distribution of catalysts

7 **BET surface and pore size analysis:** To comprehend the physical structure of TiO<sub>2</sub>,

8 40%-TiO<sub>2</sub>/CdS and CdS, N<sub>2</sub> adsorption-desorption isotherms, Brunauer-Emmett-

1 Teller (BET) surface areas model and BJH pore size distributions were acquired. As  
2 displays in (Figs. 1m and S1), the classic type IV curves with H3-type hysteresis are  
3 represented by TiO<sub>2</sub>, 40%-TiO<sub>2</sub>/CdS and CdS, the corresponding pore size varies  
4 from 2 to 50 nm<sup>1</sup>. The BET of 40%-TiO<sub>2</sub>/CdS is marginally smaller than that of CdS,  
5 which may be attributed to the TiO<sub>2</sub> ultrathin nanosheets firmly anchoring on the  
6 surface of CdS via Ti-S bonds.

7

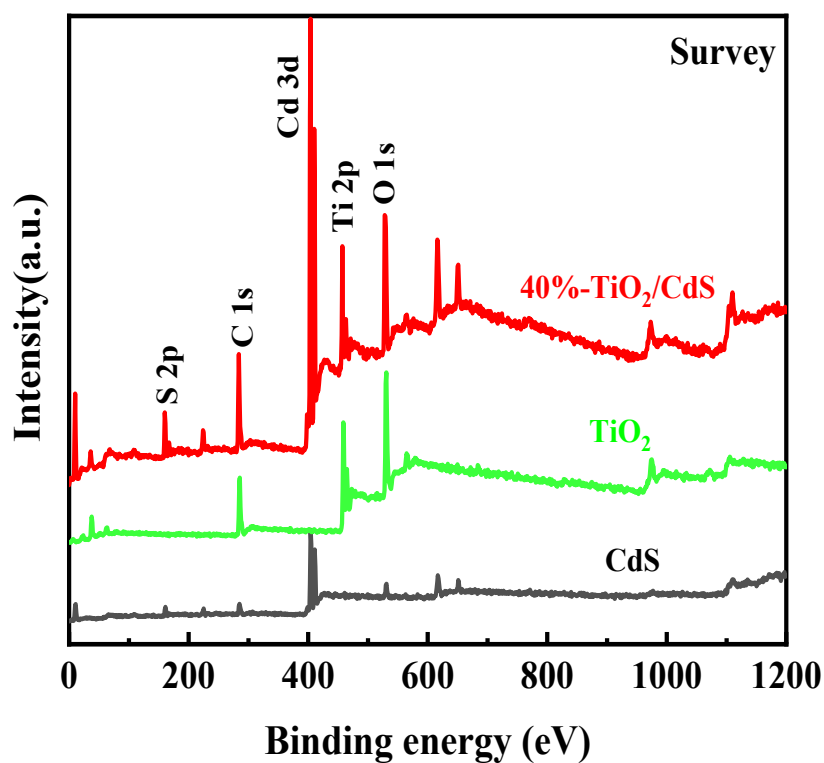

8

9

Fig. S5 The XPS survey patterns of catalyst



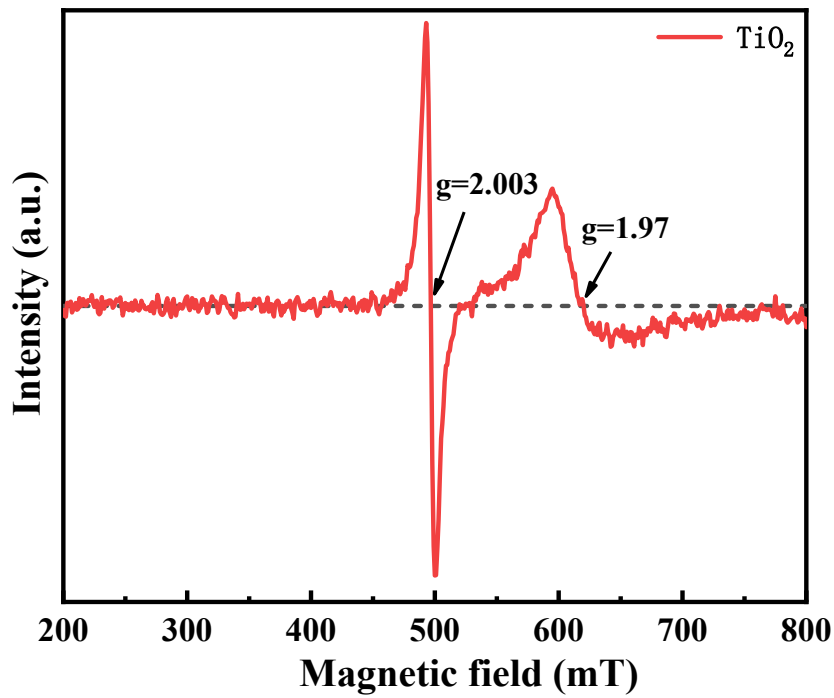

1

2 Fig. S6 The ESR spectrogram of the  $\text{TiO}_2$  at lower temperature.

3

4 The  $\text{Ti}^{3+}$  ions are characterized by very short relaxation time, so their  
 5 ESR resonances only can be detected at very low temperature, as the  
 6 recombination rate of electron-hole is significantly reduced at low temperature.

7

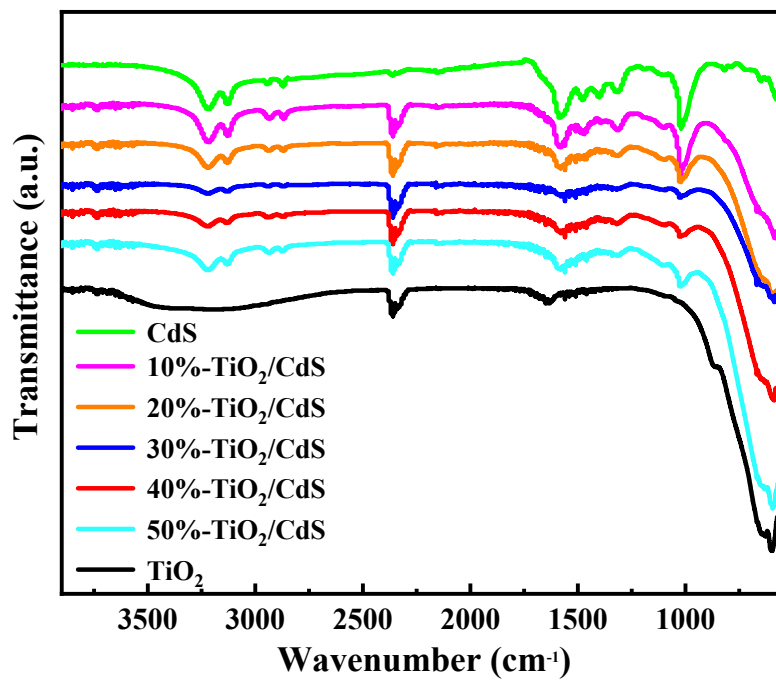

8

1 **Fig. S7** The FT-IR patterns of catalysts

2 **FT-IR analysis:** As shown in Fig. S4 Fourier transform infrared spectroscopy (FTIR)  
3 was utilized to acquire chemical structures of various photocatalysts. The absorption  
4 peaks of TiO<sub>2</sub> at 3400 and 1631 cm<sup>-1</sup> are ascribed to the ·OH stretching vibration of  
5 airborne water and the O-H bending vibration of adsorbed water molecules on TiO<sub>2</sub>  
6 surface, respectively <sup>4</sup>. The peaks at 2300-2400 cm<sup>-1</sup> are related to the asymmetric  
7 stretching vibration of the C=O bond of TiO<sub>2</sub> <sup>5</sup>. The peaks near 590 cm<sup>-1</sup> of the TiO<sub>2</sub>  
8 sample are caused by the transverse optical vibration of the Ti-O bonds, which are  
9 related to the longitudinal optical vibration represented by the broad peak of TiO<sub>2</sub> in  
10 the range of 700-950 cm<sup>-1</sup> <sup>6</sup>. The peaks of CdS near 600 cm<sup>-1</sup> are resulted from Cd-S  
11 stretching <sup>7</sup>. The peaks appear near 600 cm<sup>-1</sup> and 1000 cm<sup>-1</sup>, which are triggered by  
12 the Cd-S stretching and S-O bond stretching vibrations in CdS, respectively <sup>8</sup>. Ti-S  
13 absorption band around at 1000 cm<sup>-1</sup> overlap with CdS and cannot be differentiated <sup>9</sup>,  
14 <sup>10</sup>. FT-IR spectra showed peaks at 590, 1000, 1600, 2400, and 3400 cm<sup>-1</sup> consistent  
15 with TiO<sub>2</sub> and CdS, confirming the successful fabrication of TiO<sub>2</sub>/CdS.

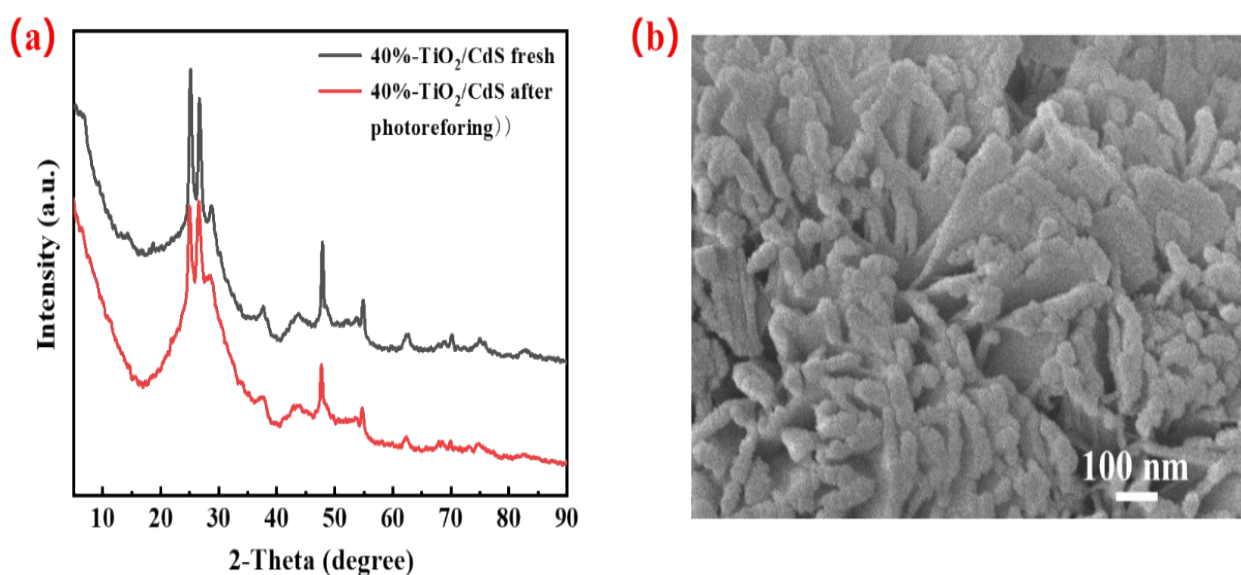

16

1 **Fig. S8** (a) XRD of 40%-TiO<sub>2</sub>/CdS fresh and after photoreforming. (b) SEM of 40%-  
 2 TiO<sub>2</sub>/CdS after photoreforming

3 **Table S1** The effects of different catalysts on the acetic acid selectivity (%) from  
 4 different biomass-based monosaccharides with various conditions

| Photocatalyst                          | Co-catalyst | Sacrificial reagent | Light source       | Reaction temperature (°C) | HER rate (μmol h <sup>-1</sup> g <sup>-1</sup> ) | Acetic acid selectivity (%) | Ref. |
|----------------------------------------|-------------|---------------------|--------------------|---------------------------|--------------------------------------------------|-----------------------------|------|
| NiTiO <sub>3</sub>                     | Pt          | Glucose             | 300W Xe            | Room temperature          | --                                               | 17                          | 11   |
| P@CN-SO <sub>3</sub> H                 | None        | Xylose              | Sunlight           | 60                        | --                                               | ~20                         | 12   |
| Ut-OCN                                 | None        | Fructose            | Sunlight           | 50                        | --                                               | ~5                          | 13   |
| CC <sub>1</sub> @mCN <sub>10</sub>     | None        | Xylose              | Sunlight           | 40                        | --                                               | ~10                         | 14   |
| O-g-C <sub>3</sub> N <sub>4</sub>      | Pt          | Glucose             | Sunlight           | Room temperature          | 2500                                             | --                          | 15   |
| CQDs/TiO <sub>2</sub>                  | None        | Glucose             | 300 W Xe           | --                        | 360                                              | --                          | 16   |
| Pt-TiO <sub>2</sub> -W <sub>0.25</sub> | None        | Glucose             | 150 W halogen lamp | --                        | 1000                                             | --                          | 17   |

|                       |      |         |            |   |      |       |              |
|-----------------------|------|---------|------------|---|------|-------|--------------|
| TiO <sub>2</sub> /CdS | None | Glucose | 300W<br>Xe | 7 | 7080 | 74.58 | This<br>work |
|-----------------------|------|---------|------------|---|------|-------|--------------|

---

1

## 2 **References:**

- 3 1 X. Yu, X. Fan, L. An, G. Liu, Z. Li, J. Liu, P. Hu, *Carbon*, 2018, **128**, 21-30.  
4 2 G. Sadanandam, X. Luo, X. Chen, Y. Bao, K. P. Homewood, Y. Gao, *Appl. Surf.*  
5 *Sci.*, 2021, **541**, 148687-148696.  
6 3 Y. Liu, A. Tang, Q. Zhang, Y. Yin, *J. Am. Chem. Soc.*, 2015, **137**, 11327-11339.  
7 4 Z. Liu, Z. Jian, J. Fang, X. Xu, X. Zhu, S. Wu, *Int. J. Photoenergy*, 2012, **2012**, 1-8.  
8 5 E. B. Aydin, G. Siğircik, H. A. M. Takci, *J. Mol. Struct.*, 2021, **1240**, 130569-  
9 130581  
10 6 S. S. Mali, S. K. Desai, D. S. Dalavi, C. A. Betty, P. N. Bhosale, P. S. Patil, *Photoch.*  
11 *Photobio. Sci.*, 2011, **10**, 1652-1658.  
12 7 Y. Li, R. He, P. Han, B. Hou, S. Peng, C. Ouyang, *Appl. Catal. B-Environ.*, 2020,  
13 **279**, 119379-119387.  
14 8 M. B. Askari, Z. T. Banizi, S. Soltani, M. Seifi, *Optik*, 2018, **157**, 230-239.  
15 9 T. Zhong, R. Jiang, Y. Hou, H. Chen, L. Ding, C. Lian, and B. Zou, *RRL Solar*,  
16 2021, **6**, 2100863-2100876.  
17 10 G. Yang, H. Shi, M. O. Jones, T. Xiao, P. P. Edwards, Z. Yan, *Appl. Catal. B*  
18 *Environ.*, 2010, **96**, 458-465.  
19 11 J. Ma, D. Jin, X. Yang, S. Sun, J. Zhou, R. Sun, *Green Chem.*, 2021, **23**, 4150-  
20 4160.  
21 12 U. Nwosu, H. Zhao, M. Kibria, J. Hu, *ACS Sustain Chem. Eng.*, 2022, **10**, 5867-  
22 5874.  
23 13 J. Ma, D. Jin, Y. Li, D. Xiao, G. Jiao, Q. Liu, Y. Guo, L. Xiao, X. Chen, X. Li, J.  
24 Zhou, R. Sun, *Appl. Catal. B Environ.*, 2021, **283**, 119520-119533.  
25 14 J. Ma, Y. Li, D. Jin, X. Yang, G. Jiao, K. Liu, S. Sun, J. Zhou, R. Sun, *Appl. Catal.*  
26 *B-Environ.*, 2021, **299**, 120698-120710.  
27 15 A. Speltini, A. Scalabrini, F. Maraschi, M. Sturini, A. Pisanu, L. Malavasi, A.  
28 Profumo, *Int. J. Hydrogen Energ.*, 2018, **43**, 14925-14933.  
29 16 H. Zhao, X. Yu, C. F. Li, W. Yu, A. Wang, Z. Y. Hu, S. Larter, Y. Li, M. Golam  
30 Kibria, J. Hu, *J. Energ. Chem.*, 2022, **64**, 201-208.  
31 17 M. Bellardita, E. I. García-López, G. Marci, G. Nasillo, L. Palmisano, *Eur. J.*  
32 *Inorg. Chem.*, 2018, **2018**, 4522-4532.

33
